# Supplementary material for: Genome-based classification of Acidihalobacter prosperus F5 (=DSM 105917=JCM 32255) as Acidihalobacter yilgarnensis sp. nov
Source: PubMed Central journal article supplement — Int J Syst Evol Microbiol. 2020 Oct 28;70(12):6226–34. doi: 10.1099/ijsem.0.004519 (PMC8049490; doi:10.1099/ijsem.0.004519), 2020-10-28
Supplement: ijsem-70-6226-s001.pdf [file ijsem-70-6226-s001.pdf]

1 **Supplementary Information**

2 **Genome-based classification of *Acidihalobacter prosperus* F5 (=DSM 105917**  
3 **=JCM 32255) as *Acidihalobacter yilgarnensis* sp. nov.**

4  
5 Himel Nahreen Khaleque<sup>1,2\*</sup>, Carolina González<sup>3,4\*</sup>, D. Barrie Johnson<sup>5,6</sup>, Anna H.  
6 Kaksonen<sup>2</sup>, David S. Holmes<sup>3,4,7†</sup> and Elizabeth L.J. Watkin<sup>1†</sup>

7 <sup>1</sup>School of Pharmacy and Biomedical Sciences, Curtin University, Perth, Australia;  
8 <sup>2</sup>CSIRO Land and Water, Floreat, Australia; <sup>3</sup>Center for Bioinformatics and Genome  
9 Biology, Fundacion Ciencia y Vida, Santiago, Chile; <sup>4</sup>Centro de Genómica y  
10 Bioinformática, Facultad de Ciencias, Universidad Mayor, Santiago, Chile; <sup>5</sup>School of  
11 Natural Sciences, Bangor University, Bangor LL57 2UW, UK; <sup>6</sup>Faculty of Health and  
12 Life Sciences, Coventry University, Coventry, CV1 5RW, UK; <sup>7</sup>Universidad San  
13 Sebastian, Santiago Chile

14  
15 \*these authors contributed equally to the work

16 †co-corresponding authors: e.watkin@curtin.edu.au; dsholmes2000@yahoo.com

17

18

19 **Supplementary Table S1.** List of microorganisms used in this study and the NCBI accession  
 20 numbers for their respective genomes.

| <b>Organism</b>                                                         | <b>NCBI Accession No.</b> |
|-------------------------------------------------------------------------|---------------------------|
| <i>Acidihalobacter</i> strain F5 <sup>T</sup>                           | CP017415.1                |
| <i>Acidihalobacter prosperus</i> DSM 5130 <sup>T</sup>                  | JQSG00000000.2            |
| <i>Acidihalobacter ferrooxydans</i> DSM 14175 <sup>T</sup>              | CP019434.1                |
| <i>Acidihalobacter aeolianus</i> DSM14174 <sup>T</sup>                  | CP017448.1                |
| <i>Halothiobacillus neopolitanus</i> ATCC 23641                         | CP001801.1                |
| <i>Alkalimnicola ehrlichii</i> ATCC BAA-1101 <sup>T</sup>               | CP000453.1                |
| <i>Ectothiorhodospira haloalkaliphila</i> ATCC 51935 <sup>T</sup>       | KK214995.1                |
| <i>Ectothiorhodospira marina</i> DSM 241 <sup>T</sup>                   | FOAA00000000              |
| <i>Ectothiorhodospira mobilis</i> DSM 4180                              | FOUO01000000              |
| <i>Ectothiorhodospira magna</i> DSM 22250 <sup>T</sup><br>(strain B7-7) | NZ_FOFO00000000           |
| <i>Halorhodospira halochloris</i> DSM 1059 <sup>T</sup>                 | CP007268.1                |
| <i>Halorhodospira halophila</i> DSM 244 <sup>T</sup>                    | CP000544.1                |
| <i>Thioalkalivibrio denitrificans</i> DSM 13742 <sup>T</sup>            | MVBK00000000.1            |
| <i>Thioalkalivibrio nitratireducens</i> DSM 14787 <sup>T</sup>          | CP003989.2                |
| <i>Thiorhodospira sibirica</i> ATCC 700588 <sup>T</sup>                 | AGFD00000000              |

21

22

23 **Supplementary Table S2.** List of COG families used for the construction of the multiprotein  
24 concatenated ribosomal phylogenomic tree.

25

- |    |                    |                           |
|----|--------------------|---------------------------|
| 26 | 1. <b>COG0048</b>  | Ribosomal protein S12     |
| 27 | 2. <b>COG0049</b>  | Ribosomal protein S7      |
| 28 | 3. <b>COG0051</b>  | Ribosomal protein S10     |
| 29 | 4. <b>COG0052</b>  | Ribosomal protein S2      |
| 30 | 5. <b>COG0080</b>  | Ribosomal protein L11     |
| 31 | 6. <b>COG0081</b>  | Ribosomal protein L1      |
| 32 | 7. <b>COG0087</b>  | Ribosomal protein L3      |
| 33 | 8. <b>COG0088</b>  | Ribosomal protein L4      |
| 34 | 9. <b>COG0089</b>  | Ribosomal protein L23     |
| 35 | 10. <b>COG0090</b> | Ribosomal protein L2      |
| 36 | 11. <b>COG0091</b> | Ribosomal protein L22     |
| 37 | 12. <b>COG0092</b> | Ribosomal protein S3      |
| 38 | 13. <b>COG0093</b> | Ribosomal protein L14     |
| 39 | 14. <b>COG0094</b> | Ribosomal protein L5      |
| 40 | 15. <b>COG0096</b> | Ribosomal protein S8      |
| 41 | 16. <b>COG0097</b> | Ribosomal protein L6P/L9E |
| 42 | 17. <b>COG0098</b> | Ribosomal protein S5      |
| 43 | 18. <b>COG0100</b> | Ribosomal protein S11     |
| 44 | 19. <b>COG0102</b> | Ribosomal protein L13     |
| 45 | 20. <b>COG0103</b> | Ribosomal protein S9      |

|    |                    |                                           |
|----|--------------------|-------------------------------------------|
| 46 | 21. <b>COG0184</b> | Ribosomal protein S15P/S13E               |
| 47 | 22. <b>COG0185</b> | Ribosomal protein S19                     |
| 48 | 23. <b>COG0186</b> | Ribosomal protein S17                     |
| 49 | 24. <b>COG0198</b> | Ribosomal protein L24                     |
| 50 | 25. <b>COG0199</b> | Ribosomal protein S14                     |
| 51 | 26. <b>COG0200</b> | Ribosomal protein L15                     |
| 52 | 27. <b>COG0244</b> | Ribosomal protein L10                     |
| 53 | 28. <b>COG0256</b> | Ribosomal protein L18                     |
| 54 | 29. <b>COG0522</b> | Ribosomal protein S4 and related proteins |
| 55 | 30. <b>COG1841</b> | Ribosomal protein L30/L7E                 |
